# Supplementary material for: Hypertensive Adults Exhibit Lower Myelin Content: A Multicomponent Relaxometry and Diffusion Magnetic Resonance Imaging Study
Source: PubMed Central journal article supplement — Hypertension. 2023 Jun 7;80(8):1728–38. doi: 10.1161/HYPERTENSIONAHA.123.21012 (PMC10355798; doi:10.1161/hypertensionaha.123.21012), 2023-06-07
Supplement: hyp-80-1728-s001.pdf [file hyp-80-1728-s001.pdf]

## Online supplement

### **Hypertensive adults exhibit lower myelin content: A multicomponent relaxometry and diffusion MRI study**

John P. Laporte<sup>1</sup>, Mary E. Faulkner<sup>1</sup>, Zhaoyuan Gong<sup>1</sup>, Mohammad A.B.S. Akhonda<sup>1</sup>, Luigi Ferrucci<sup>2</sup>, Josephine M. Egan<sup>1</sup>, and Mustapha Bouhrara<sup>1\*</sup>

<sup>1</sup>Laboratory of Clinical Investigation, National Institute on Aging, National Institutes of Health, Baltimore, 21224 MD, USA.

<sup>2</sup>Translational Gerontology Branch, National Institute on Aging, National Institutes of Health, Baltimore, 21224 MD, USA.

**\*Corresponding author:** Mustapha Bouhrara, Magnetic Resonance Physics of Aging and Dementia Unit, Laboratory of Clinical Investigation, National Institute on Aging (NIA), NIH, BRC 05C-222, 251 Bayview Blvd., Baltimore 21224 MD, USA. Tel: 410-558-8541, E-mail: [bouhraram@mail.nih.gov](mailto:bouhraram@mail.nih.gov)

**Table S1.** Regression coefficient ( $\beta$ ), including standard error (SE) in italics, and significance ( $p$ -value) of Myelin Water Fraction vs. Hypertension, age, smoking, sex, diabetes, and cholesterol across 14 WM ROIs. The multiple regression model is given by:  $MWF \sim \beta_0 + \beta_{age} \times age + \beta_{Hypertension} \times Hypertension + \beta_{SBP} \times SBP + \beta_{Smoking} \times Smoking + \beta_{sex} \times sex + \beta_{Diabetes} \times Diabetes + \beta_{Cholesterol} \times Cholesterol$ . The regression model accounted for sex, smoking status, diabetes status and hypertension as categorical variables. Bolded  $p$ -values indicate statistical significance ( $p < 0.05$ ) or close-to-significance ( $p < 0.1$ ).

| ROIs | Myelin Water Fraction (MWF)                    |                                       |                                       |                                           |                                       |                                            |                                               |
|------|------------------------------------------------|---------------------------------------|---------------------------------------|-------------------------------------------|---------------------------------------|--------------------------------------------|-----------------------------------------------|
|      | Hypertension<br>$\beta$ (SE) *10 <sup>-2</sup> | Age<br>$\beta$ (SE) *10 <sup>-4</sup> | SBP<br>$\beta$ (SE) *10 <sup>-4</sup> | Smoking<br>$\beta$ (SE) *10 <sup>-3</sup> | Sex<br>$\beta$ (SE) *10 <sup>-3</sup> | Diabetes<br>$\beta$ (SE) *10 <sup>-2</sup> | Cholesterol<br>$\beta$ (SE) *10 <sup>-5</sup> |
| WB   | -1.97 (0.68), <b>0.010</b>                     | -9.64 (1.76), < <b>0.001</b>          | 2.76 (2.17), 0.390                    | 3.10 (5.72), 0.831                        | -4.44 (5.84), 0.856                   | 0.82 (1.56), 0.898                         | 1.51 (9.14), 0.959                            |
| FL   | -2.43 (0.67), <b>0.006</b>                     | -11.2 (1.73), < <b>0.001</b>          | 4.34 (2.14), 0.390                    | 4.52 (5.64), 0.831                        | -4.89 (5.76), 0.856                   | 0.34 (1.54), 0.898                         | 1.06 (9.00), 0.959                            |
| OL   | -1.55 (0.87), <b>0.090</b>                     | -8.43 (2.23), < <b>0.001</b>          | 1.36 (2.76), 0.670                    | 4.26 (7.25), 0.831                        | -4.04 (7.41), 0.856                   | 1.34 (1.98), 0.898                         | -0.60 (11.6), 0.959                           |
| PL   | -2.41 (0.78), <b>0.010</b>                     | -10.1 (2.00), < <b>0.001</b>          | 3.85 (2.47), 0.390                    | 3.35 (6.50), 0.831                        | -11.4 (6.64), 0.856                   | 0.41 (1.77), 0.898                         | -3.44 (10.4), 0.959                           |
| TL   | -1.84 (0.82), <b>0.038</b>                     | -9.28 (2.10), < <b>0.001</b>          | 2.16 (2.60), 0.570                    | 3.99 (6.84), 0.831                        | -3.86 (6.98), 0.856                   | 1.57 (1.86), 0.898                         | 2.56 (10.9), 0.959                            |
| CRB  | -0.50 (0.73), 0.500                            | -6.70 (1.89), < <b>0.001</b>          | 0.02 (2.33), 0.994                    | -5.70 (6.14), 0.831                       | 1.69 (6.27), 0.856                    | 1.76 (1.67), 0.898                         | 4.81 (9.80), 0.959                            |
| CC   | -2.06 (0.69), <b>0.010</b>                     | -9.01 (1.77), < <b>0.001</b>          | 2.91 (2.19), 0.390                    | -1.65 (5.76), 0.836                       | -7.33 (5.88), 0.856                   | 1.24 (1.57), 0.898                         | 2.47 (9.20), 0.959                            |
| IC   | -1.40 (0.71), <b>0.067</b>                     | -9.61 (1.83), < <b>0.001</b>          | 1.26 (2.26), 0.670                    | 2.71 (5.94), 0.831                        | 1.72 (6.07), 0.856                    | 1.04 (1.62), 0.898                         | 7.69 (9.49), 0.959                            |
| CR   | -3.03 (0.88), <b>0.006</b>                     | -11.8 (2.27), < <b>0.001</b>          | 4.39 (2.80), 0.390                    | 0.24 (7.37), 0.974                        | -2.25 (7.53), 0.830                   | -0.33 (2.01), 0.898                        | 2.76 (11.8), 0.959                            |
| CP   | -0.70 (0.63), 0.285                            | -4.07 (1.61), <b>0.013</b>            | -1.21 (1.99), 0.670                   | 4.19 (5.23), 0.831                        | 1.40 (5.34), 0.856                    | 2.25 (1.43), 0.898                         | 10.6 (8.36), 0.959                            |
| TR   | -2.20 (0.83), <b>0.015</b>                     | -10.1 (2.14), < <b>0.001</b>          | 2.68 (2.65), 0.488                    | 2.52 (6.96), 0.836                        | 0.36 (7.11), 0.960                    | 0.24 (1.90), 0.898                         | 1.31 (11.1), 0.959                            |
| FOF  | -2.37 (0.77), <b>0.010</b>                     | -10.7 (1.98), < <b>0.001</b>          | 3.33 (2.45), 0.390                    | 4.31 (6.44), 0.831                        | 4.36 (6.58), 0.856                    | -0.24 (1.76), 0.898                        | 4.85 (10.3), 0.959                            |
| LF   | -2.28 (0.80), <b>0.010</b>                     | -9.92 (2.06), < <b>0.001</b>          | 3.37 (2.55), 0.390                    | 3.02 (6.70), 0.831                        | -3.19 (6.85), 0.856                   | 0.25 (1.83), 0.898                         | 1.44 (10.7), 0.959                            |
| Fr   | -2.24 (0.76), <b>0.010</b>                     | -10.6 (1.95), < <b>0.001</b>          | 2.96 (2.41), 0.390                    | 3.26 (6.35), 0.831                        | -3.68 (6.49), 0.856                   | 1.04 (1.73), 0.898                         | -1.92 (10.1), 0.959                           |

MWF, myelin water fraction; WM, white matter; ROI, region-of-interest; WB, whole brain; FL, frontal lobe; OL, occipital lobe; PL, parietal lobe; TL, temporal lobe; CRB, cerebellum; IC, internal capsule; CR, corona radiata; CC, corpus callosum; TR, thalamic radiation; FOF, fronto-occipital fasciculus; LF, longitudinal fasciculus; Fr, forceps.

**Table S2.** Regression coefficient ( $\beta$ ), including standard error (SE) in italics, and significance ( $p$ -value) of Longitudinal relaxation rate ( $R_1$ ) vs. Hypertension, age, smoking, sex, diabetes, and cholesterol across 14 WM ROIs. The multiple regression model is given by:  $R_1 \sim \beta_0 + \beta_{age} \times age + \beta_{Hypertension} \times Hypertension + \beta_{SBP} \times SBP + \beta_{Smoking} \times Smoking + \beta_{sex} \times sex + \beta_{Diabetes} \times Diabetes + \beta_{Cholesterol} \times Cholesterol$ . The regression model accounted for sex, smoking status, diabetes status and hypertension as categorical variables. Bolded  $p$ -values indicate statistical significance ( $p < 0.05$ ) or close-to-significance ( $p < 0.1$ ).

| ROIs | Longitudinal relaxation rate ( $R_1$ )         |                                       |                                       |                                           |                                       |                                            |                                               |
|------|------------------------------------------------|---------------------------------------|---------------------------------------|-------------------------------------------|---------------------------------------|--------------------------------------------|-----------------------------------------------|
|      | Hypertension<br>$\beta$ (SE) *10 <sup>-5</sup> | Age<br>$\beta$ (SE) *10 <sup>-6</sup> | SBP<br>$\beta$ (SE) *10 <sup>-6</sup> | Smoking<br>$\beta$ (SE) *10 <sup>-5</sup> | Sex<br>$\beta$ (SE) *10 <sup>-5</sup> | Diabetes<br>$\beta$ (SE) *10 <sup>-5</sup> | Cholesterol<br>$\beta$ (SE) *10 <sup>-7</sup> |
| WB   | -5.76 (1.74), <b>0.004</b>                     | -1.71 (0.45), < <b>0.001</b>          | 1.18 (0.55), <b>0.075</b>             | 0.13 (1.46), 0.987                        | -2.53 (1.49), 0.215                   | -2.19 (3.97), 0.989                        | 0.44 (2.32), 0.999                            |
| FL   | -6.77 (1.61), <b>0.001</b>                     | -2.06 (0.41), < <b>0.001</b>          | 1.60 (0.51), <b>0.034</b>             | 0.91 (1.34), 0.987                        | -2.66 (1.37), 0.215                   | -3.65 (3.66), 0.989                        | 0.67 (2.15), 0.999                            |
| OL   | -4.18 (1.98), <b>0.043</b>                     | -1.41 (0.51), <b>0.008</b>            | 0.70 (0.63), 0.315                    | 0.34 (1.66), 0.987                        | -2.12 (1.70), 0.260                   | -1.11 (4.53), 0.989                        | -1.28 (2.65), 0.999                           |
| PL   | -6.05 (1.75), <b>0.003</b>                     | -1.87 (0.45), < <b>0.001</b>          | 1.22 (0.56), <b>0.075</b>             | 0.25 (1.47), 0.987                        | -3.41 (1.50), 0.215                   | -3.60 (4.00), 0.989                        | -2.05 (2.34), 0.999                           |
| TL   | -4.91 (1.83), <b>0.011</b>                     | -1.77 (0.47), < <b>0.001</b>          | 1.05 (0.58), <b>0.097</b>             | -0.25 (1.53), 0.987                       | -2.36 (1.56), 0.250                   | -0.06 (4.17), 0.989                        | -0.87 (2.44), 0.999                           |
| CRB  | -2.63 (1.78), 0.145                            | -1.09 (0.46), <b>0.021</b>            | 0.45 (0.57), 0.433                    | -1.10 (1.49), 0.987                       | -2.64 (1.52), 0.215                   | -0.06 (4.07), 0.989                        | 0.02 (2.38), 0.999                            |
| CC   | -7.41 (1.82), <b>0.001</b>                     | -1.90 (0.47), < <b>0.001</b>          | 1.35 (0.58), <b>0.075</b>             | -1.10 (1.52), 0.987                       | -3.39 (1.55), 0.215                   | -1.86 (4.14), 0.989                        | -0.15 (2.43), 0.999                           |
| IC   | -4.91 (1.74), <b>0.008</b>                     | -1.77 (0.45), < <b>0.001</b>          | 1.18 (0.55), <b>0.075</b>             | -0.57 (1.45), 0.987                       | -1.99 (1.49), 0.259                   | -0.76 (3.97), 0.989                        | -0.19 (2.32), 0.999                           |
| CR   | -7.79 (1.93), <b>0.001</b>                     | -2.16 (0.50), < <b>0.001</b>          | 1.30 (0.61), <b>0.075</b>             | 0.10 (1.61), 0.987                        | -2.02 (1.65), 0.830                   | -4.19 (4.40), 0.989                        | -0.83 (2.58), 0.999                           |
| CP   | -3.70 (1.77), <b>0.043</b>                     | -0.50 (0.46), 0.273                   | 0.57 (0.56), 0.336                    | 0.27 (1.48), 0.987                        | -1.48 (1.51), 0.356                   | -0.26 (4.04), 0.989                        | 1.11 (2.37), 0.999                            |
| TR   | -5.70 (1.88), <b>0.006</b>                     | -2.04 (0.48), < <b>0.001</b>          | 1.07 (0.60), <b>0.097</b>             | -0.50 (1.57), 0.987                       | -2.16 (1.61), 0.259                   | -2.27 (4.29), 0.989                        | -1.27 (2.51), 0.999                           |
| FOF  | -5.95 (1.85), <b>0.004</b>                     | -2.09 (0.48), < <b>0.001</b>          | 1.14 (0.59), <b>0.086</b>             | 0.63 (1.55), 0.987                        | -0.85 (1.58), 0.592                   | -2.89 (4.22), 0.989                        | -0.02 (2.47), 0.999                           |
| LF   | -5.63 (1.88), <b>0.006</b>                     | -2.02 (0.49), < <b>0.001</b>          | 1.33 (0.60), <b>0.075</b>             | 0.14 (1.58), 0.987                        | -2.38 (1.61), 0.250                   | -3.06 (4.30), 0.989                        | -1.58 (2.52), 0.999                           |
| Fr   | -6.12 (1.87), <b>0.004</b>                     | -2.02 (0.48), < <b>0.001</b>          | 1.21 (0.59), <b>0.080</b>             | -0.07 (1.56), 0.987                       | -2.93 (1.59), 0.215                   | -1.57 (4.26), 0.989                        | -1.40 (2.49), 0.999                           |

$R_1$ , longitudinal relaxation rate; WM, white matter; ROI, region-of-interest; WB, whole brain; FL, frontal lobe; OL, occipital lobe; PL, parietal lobe; TL, temporal lobe; CRB, cerebellum; IC, internal capsule; CR, corona radiata; CC, corpus callosum; TR, thalamic radiation; FOF, fronto-occipital fasciculus; LF, longitudinal fasciculus; Fr, forceps.

**Table S3.** Regression coefficient ( $\beta$ ), including standard error (SE) in italics, and significance ( $p$ -value) of Transverse relaxation rate ( $R_2$ ) vs. Hypertension, age, smoking, sex, diabetes, and cholesterol across 14 WM ROIs. The multiple regression model is given by:  $R_2 \sim \beta_0 + \beta_{age} \times age + \beta_{Hypertension} \times Hypertension + \beta_{SBP} \times SBP + \beta_{Smoking} \times Smoking + \beta_{sex} \times sex + \beta_{Diabetes} \times Diabetes + \beta_{Cholesterol} \times Cholesterol$ . The regression model accounted for sex, smoking status, diabetes status and hypertension as categorical variables. Bolded  $p$ -values indicate statistical significance ( $p < 0.05$ ) or close-to-significance ( $p < 0.1$ ).

| ROIs | Transverse relaxation rate ( $R_2$ )     |                                 |                                 |                                     |                                 |                                      |                                         |
|------|------------------------------------------|---------------------------------|---------------------------------|-------------------------------------|---------------------------------|--------------------------------------|-----------------------------------------|
|      | Hypertension<br>$\beta$ (SE) * $10^{-3}$ | Age<br>$\beta$ (SE) * $10^{-5}$ | SBP<br>$\beta$ (SE) * $10^{-5}$ | Smoking<br>$\beta$ (SE) * $10^{-4}$ | Sex<br>$\beta$ (SE) * $10^{-4}$ | Diabetes<br>$\beta$ (SE) * $10^{-3}$ | Cholesterol<br>$\beta$ (SE) * $10^{-6}$ |
| WB   | -1.20 (0.46), <b>0.021</b>               | -6.12 (1.17), < <b>0.001</b>    | 0.99 (1.45), 0.786              | -0.33 (3.81), 0.931                 | -3.13 (3.89), 0.870             | 0.82 (1.04), 0.829                   | 3.55 (6.09), 0.940                      |
| FL   | -1.45 (0.45), <b>0.009</b>               | -6.95 (1.15), < <b>0.001</b>    | 2.11 (1.42), 0.786              | 1.80 (3.74), 0.931                  | -2.59 (3.82), 0.870             | 0.61 (1.02), 0.829                   | 2.49 (5.97), 0.940                      |
| OL   | -1.19 (0.57), <b>0.052</b>               | -5.61 (1.47), < <b>0.001</b>    | 0.32 (1.82), 0.861              | -1.23 (4.79), 0.931                 | -5.52 (4.89), 0.870             | 0.93 (1.31), 0.829                   | -0.56 (7.65), 0.942                     |
| PL   | -1.35 (0.53), <b>0.021</b>               | -7.06 (1.37), < <b>0.001</b>    | 1.84 (1.70), 0.786              | -2.97 (4.46), 0.931                 | -9.07 (4.56), 0.700             | 0.36 (1.22), 0.846                   | -1.38 (7.13), 0.940                     |
| TL   | -1.28 (0.54), <b>0.027</b>               | -5.55 (1.38), < <b>0.001</b>    | 1.11 (1.71), 0.786              | 0.59 (4.50), 0.931                  | -3.73 (4.59), 0.870             | 1.26 (1.23), 0.829                   | 3.56 (7.18), 0.940                      |
| CRB  | -0.20 (0.51), 0.693                      | -4.71 (1.30), < <b>0.001</b>    | 0.43 (1.61), 0.861              | -4.20 (4.24), 0.931                 | 0.88 (4.33), 0.903              | 0.52 (1.16), 0.829                   | 4.19 (6.77), 0.940                      |
| CC   | -1.72 (0.55), <b>0.009</b>               | -6.78 (1.42), < <b>0.001</b>    | 1.02 (1.76), 0.786              | -3.86 (4.62), 0.931                 | -3.07 (4.72), 0.870             | 1.80 (1.26), 0.829                   | 6.15 (7.39), 0.940                      |
| IC   | -0.84 (0.43), <b>0.065</b>               | -5.48 (1.11), < <b>0.001</b>    | 0.87 (1.37), 0.786              | 2.85 (3.61), 0.931                  | 0.17 (3.68), 0.963              | 0.99 (0.98), 0.829                   | 5.37 (5.76), 0.940                      |
| CR   | -1.71 (0.53), <b>0.009</b>               | -5.84 (1.37), < <b>0.001</b>    | 1.31 (1.70), 0.786              | 0.46 (4.47), 0.931                  | 1.79 (4.56), 0.830              | 0.24 (1.22), 0.846                   | 5.44 (7.13), 0.940                      |
| CP   | -0.31 (0.48), 0.561                      | -3.54 (1.23), < <b>0.001</b>    | -1.11 (1.52), 0.786             | 1.73 (3.99), 0.931                  | -1.81 (4.08), 0.870             | 1.87 (1.09), 0.829                   | 7.63 (6.37), 0.940                      |
| TR   | -1.38 (0.53), <b>0.021</b>               | -5.34 (1.37), <b>0.005</b>      | 0.43 (1.69), 0.861              | 2.33 (4.44), 0.931                  | 2.31 (4.53), 0.870              | 0.64 (1.21), 0.829                   | 3.24 (7.09), 0.940                      |
| FOF  | -1.52 (0.51), <b>0.010</b>               | -6.71 (1.30), < <b>0.001</b>    | 1.34 (1.61), 0.786              | 3.17 (4.24), 0.931                  | 3.32 (4.33), 0.870              | 0.30 (1.16), 0.846                   | 5.27 (6.77), 0.940                      |
| LF   | -1.29 (0.50), <b>0.021</b>               | -5.35 (1.29), < <b>0.001</b>    | 0.53 (1.59), 0.861              | 1.38 (4.18), 0.931                  | -2.71 (4.27), 0.870             | 0.59 (1.14), 0.829                   | 1.77 (6.68), 0.940                      |
| Fr   | -1.57 (0.51), <b>0.009</b>               | -6.38 (1.30), < <b>0.001</b>    | 1.41 (1.61), 0.786              | 0.62 (4.23), 0.931                  | -1.41 (4.32), 0.870             | 0.97 (1.15), 0.829                   | 1.09 (6.76), 0.940                      |

$R_2$ , transverse relaxation rate; WM, white matter; ROI, region-of-interest; WB, whole brain; FL, frontal lobe; OL, occipital lobe; PL, parietal lobe; TL, temporal lobe; CRB, cerebellum; IC, internal capsule; CR, corona radiata; CC, corpus callosum; TR, thalamic radiation; FOF, fronto-occipital fasciculus; LF, longitudinal fasciculus; Fr, forceps.

**Table S4.** Regression coefficient ( $\beta$ ), including standard error (SE) in italics, and significance ( $p$ -value) of Fractional Anisotropy vs. Hypertension, age, smoking, sex, diabetes, and cholesterol across 14 WM ROIs. The multiple regression model is given by:  $FA \sim \beta_0 + \beta_{age} \times age + \beta_{Hypertension} \times Hypertension + \beta_{SBP} \times SBP + \beta_{Smoking} \times Smoking + \beta_{sex} \times sex + \beta_{Diabetes} \times Diabetes + \beta_{Cholesterol} \times Cholesterol$ . The regression model accounted for sex, smoking status, diabetes status and hypertension as categorical variables. Bolded  $p$ -values indicate statistical significance ( $p < 0.05$ ) or close-to-significance ( $p < 0.1$ ).

| ROIs | Fractional Anisotropy (FA)               |                                 |                                 |                                     |                                 |                                      |                                         |
|------|------------------------------------------|---------------------------------|---------------------------------|-------------------------------------|---------------------------------|--------------------------------------|-----------------------------------------|
|      | Hypertension<br>$\beta$ (SE) * $10^{-2}$ | Age<br>$\beta$ (SE) * $10^{-4}$ | SBP<br>$\beta$ (SE) * $10^{-4}$ | Smoking<br>$\beta$ (SE) * $10^{-3}$ | Sex<br>$\beta$ (SE) * $10^{-3}$ | Diabetes<br>$\beta$ (SE) * $10^{-3}$ | Cholesterol<br>$\beta$ (SE) * $10^{-5}$ |
| WB   | -1.20 (0.53), <b>0.041</b>               | -6.87 (1.36), < <b>0.001</b>    | 0.48 (1.66), 0.774              | -3.78 (4.42), 0.884                 | -2.98 (4.50), 0.830             | -2.99 (11.8), 0.931                  | -0.93 (6.95), 0.950                     |
| FL   | -2.51 (0.51), < <b>0.001</b>             | -8.65 (1.31), < <b>0.001</b>    | 3.34 (1.60), <b>0.089</b>       | -0.62 (4.26), 0.884                 | -6.37 (4.34), 0.830             | -7.57 (11.4), 0.931                  | -2.56 (6.70), 0.950                     |
| OL   | -1.81 (0.56), <b>0.006</b>               | -10.3 (1.44), < <b>0.001</b>    | 3.38 (1.77), <b>0.094</b>       | 3.42 (4.70), 0.884                  | 1.56 (4.79), 0.830              | -3.57 (12.5), 0.931                  | 11.3 (7.39), 0.676                      |
| PL   | -1.08 (0.78), 0.168                      | -5.02 (2.00), <b>0.015</b>      | 5.16 (2.45), <b>0.089</b>       | 6.23 (6.50), 0.884                  | 2.53 (6.63), 0.830              | 8.61 (17.4), 0.931                   | 12.1 (10.2), 0.676                      |
| TL   | -5.52 (1.36), < <b>0.001</b>             | -19.3 (3.49), < <b>0.001</b>    | 8.74 (4.28), <b>0.089</b>       | -13.2 (11.4), 0.884                 | -3.14 (11.6), 0.830             | -19.4 (30.3), 0.931                  | -2.99 (17.9), 0.950                     |
| CRB  | -2.50 (1.14), <b>0.044</b>               | -7.99 (2.93), <b>0.009</b>      | 8.94 (3.59), <b>0.089</b>       | 5.33 (9.53), 0.884                  | 2.09 (9.71), 0.830              | -13.9 (25.4), 0.931                  | 21.9 (15.0), 0.676                      |
| CC   | -1.87 (0.70), <b>0.021</b>               | -11.8 (1.79), < <b>0.001</b>    | 4.18 (2.19), <b>0.094</b>       | 1.22 (5.81), 0.884                  | 5.74 (5.93), 0.830              | -10.9 (15.5), 0.931                  | 0.58 (9.15), 0.950                      |
| IC   | -2.60 (1.14), <b>0.041</b>               | -6.35 (2.93), <b>0.033</b>      | 1.56 (3.59), 0.717              | -1.52 (9.53), 0.884                 | 3.91 (9.71), 0.830              | 3.14 (25.4), 0.931                   | 7.75 (15.0), 0.950                      |
| CR   | -2.04 (0.64), <b>0.006</b>               | -10.4 (1.64), < <b>0.001</b>    | 3.72 (2.01), <b>0.094</b>       | 2.28 (5.32), 0.884                  | 10.2 (5.43), 0.830              | -10.2 (14.2), 0.931                  | 10.9 (8.38), 0.676                      |
| CP   | -1.64 (0.92), <b>0.091</b>               | -7.91 (2.35), <b>0.001</b>      | 6.06 (2.88), <b>0.089</b>       | 1.97 (7.64), 0.884                  | 3.55 (7.79), 0.830              | -3.50 (20.4), 0.931                  | 8.65 (12.0), 0.950                      |
| TR   | -1.76 (0.77), <b>0.041</b>               | -6.86 (1.98), <b>0.001</b>      | 3.96 (2.43), 0.125              | 7.70 (6.45), 0.884                  | 7.40 (6.58), 0.830              | -5.60 (17.2), 0.931                  | 16.3 (10.2), 0.676                      |
| FOF  | -3.24 (0.90), <b>0.002</b>               | -15.0 (2.29), < <b>0.001</b>    | 4.98 (2.81), 0.103              | -5.96 (7.47), 0.884                 | -2.18 (7.61), 0.830             | -4.38 (19.9), 0.931                  | 2.98 (11.8), 0.950                      |
| LF   | -6.49 (0.34), <b>0.074</b>               | -7.54 (0.87), < <b>0.001</b>    | 2.38 (1.06), <b>0.089</b>       | -1.66 (2.82), 0.884                 | -3.21 (2.87), 0.830             | -5.02 (7.52), 0.931                  | -1.29 (4.43), 0.950                     |
| Fr   | -6.92 (0.45), 0.136                      | -8.91 (1.15), < <b>0.001</b>    | 3.01 (1.41), <b>0.089</b>       | -1.41 (3.74), 0.884                 | -2.02 (3.81), 0.830             | 0.16 (9.98), 0.988                   | -3.94 (5.88), 0.950                     |

FA, fractional anisotropy; WM, white matter; ROI, region-of-interest; WB, whole brain; FL, frontal lobe; OL, occipital lobe; PL, parietal lobe; TL, temporal lobe; CRB, cerebellum; IC, internal capsule; CR, corona radiata; CC, corpus callosum; TR, thalamic radiation; FOF, fronto-occipital fasciculus; LF, longitudinal fasciculus; Fr, forceps.

**Table S5.** Regression coefficient ( $\beta$ ), including standard error (SE) in italics, and significance ( $p$ -value) of Medial Diffusivity vs. Hypertension, age, smoking, sex, diabetes, and cholesterol across 14 WM ROIs. The multiple regression model is given by:  $MD \sim \beta_0 + \beta_{age} \times age + \beta_{Hypertension} \times Hypertension + \beta_{SBP} \times SBP + \beta_{Smoking} \times Smoking + \beta_{sex} \times sex + \beta_{Diabetes} \times Diabetes + \beta_{Cholesterol} \times Cholesterol$ . The regression model accounted for sex, smoking status, diabetes status and hypertension as categorical variables. Bolded  $p$ -values indicate statistical significance ( $p < 0.05$ ) or close-to-significance ( $p < 0.1$ ).

| ROIs | Medial Diffusivity (MD)                        |                                       |                                       |                                           |                                       |                                            |                                               |  |
|------|------------------------------------------------|---------------------------------------|---------------------------------------|-------------------------------------------|---------------------------------------|--------------------------------------------|-----------------------------------------------|--|
|      | Hypertension<br>$\beta$ (SE) *10 <sup>-5</sup> | Age<br>$\beta$ (SE) *10 <sup>-6</sup> | SBP<br>$\beta$ (SE) *10 <sup>-6</sup> | Smoking<br>$\beta$ (SE) *10 <sup>-5</sup> | Sex<br>$\beta$ (SE) *10 <sup>-5</sup> | Diabetes<br>$\beta$ (SE) *10 <sup>-5</sup> | Cholesterol<br>$\beta$ (SE) *10 <sup>-7</sup> |  |
| WB   | 1.68 (1.47), 0.276                             | 2.46 (0.38), <0.001                   | -0.58 (0.46), 0.231                   | 1.39 (1.23), 0.525                        | 4.47 (1.25), <b>0.009</b>             | -0.37 (3.28), 0.912                        | -1.44 (1.93), 0.801                           |  |
| FL   | 2.77 (1.67), 0.128                             | 3.92 (0.43), <0.001                   | -1.32 (0.52), <b>0.066</b>            | 2.02 (1.39), 0.431                        | 2.97 (1.42), 0.114                    | -1.90 (3.71), 0.912                        | -0.76 (2.19), 0.801                           |  |
| OL   | 2.99 (0.91), <b>0.021</b>                      | 2.03 (0.23), <0.001                   | -0.75 (0.29), <b>0.066</b>            | 0.44 (0.76), 0.653                        | 2.02 (0.77), <b>0.076</b>             | -0.35 (2.03), 0.912                        | -0.54 (1.19), 0.801                           |  |
| PL   | 2.21 (1.52), 0.175                             | 0.67 (0.39), <b>0.089</b>             | -0.81 (0.48), 0.148                   | 0.86 (1.27), 0.638                        | -0.40 (1.29), 0.759                   | 4.45 (3.39), 0.484                         | -0.77 (1.99), 0.801                           |  |
| TL   | 5.67 (2.12), <b>0.032</b>                      | 2.23 (0.54), <0.001                   | -1.68 (0.67), <b>0.066</b>            | 2.37 (1.77), 0.431                        | 1.02 (1.81), 0.661                    | -1.01 (4.73), 0.912                        | -2.40 (2.79), 0.801                           |  |
| CRB  | 4.55 (2.01), <b>0.042</b>                      | 2.95 (0.52), <0.001                   | -1.16 (0.63), 0.121                   | 1.64 (1.68), 0.546                        | 2.12 (1.71), 0.339                    | -1.62 (4.47), 0.912                        | -1.50 (2.64), 0.801                           |  |
| CC   | 5.79 (2.02), <b>0.030</b>                      | 1.98 (0.52), <0.001                   | -0.95 (0.63), 0.164                   | 1.58 (1.68), 0.546                        | 0.87 (1.71), 0.661                    | -7.33 (4.49), 0.484                        | -1.24 (2.65), 0.801                           |  |
| IC   | 4.05 (1.80), <b>0.042</b>                      | 2.34 (0.46), <0.001                   | -1.10 (0.56), 0.121                   | -1.09 (1.50), 0.638                       | 3.15 (1.53), 0.114                    | 0.69 (4.00), 0.912                         | 1.09 (2.36), 0.801                            |  |
| CR   | 2.97 (1.21), <b>0.037</b>                      | 1.32 (0.31), <0.001                   | -0.16 (0.38), 0.670                   | 0.05 (1.01), 0.962                        | 0.69 (1.03), 0.830                    | 4.07 (2.69), 0.484                         | 0.19 (1.59), 0.801                            |  |
| CP   | 5.01 (1.78), <b>0.030</b>                      | 2.45 (0.46), <0.001                   | -1.25 (0.56), <b>0.099</b>            | 2.21 (1.49), 0.431                        | 1.01 (1.52), 0.645                    | 9.11 (3.98), 0.345                         | -0.77 (2.34), 0.801                           |  |
| TR   | 2.82 (1.11), <b>0.036</b>                      | 1.11 (0.28), <0.001                   | -0.66 (0.35), 0.121                   | 0.33 (0.93), 0.782                        | 1.60 (0.94), 0.186                    | 3.29 (2.47), 0.484                         | 0.63 (1.46), 0.801                            |  |
| FOF  | 3.52 (1.56), <b>0.042</b>                      | 1.36 (0.40), <0.001                   | -0.73 (0.49), 0.164                   | 1.74 (1.30), 0.431                        | 2.66 (1.33), 0.114                    | 1.09 (3.48), 0.912                         | -1.25 (2.05), 0.801                           |  |
| LF   | 3.75 (2.14), 0.119                             | 6.10 (0.55), <0.001                   | -1.35 (0.67), 0.121                   | 2.49 (1.79), 0.431                        | 4.00 (1.82), 0.114                    | -3.30 (4.78), 0.912                        | -2.53 (2.81), 0.801                           |  |
| Fr   | 2.16 (2.98), 0.470                             | 7.84 (0.76), <0.001                   | -1.43 (0.94), 0.164                   | 3.38 (2.49), 0.431                        | 3.44 (2.54), 0.313                    | -8.44 (6.64), 0.484                        | -1.41 (3.91), 0.801                           |  |

MD, medial diffusivity; WM, white matter; ROI, region-of-interest; WB, whole brain; FL, frontal lobe; OL, occipital lobe; PL, parietal lobe; TL, temporal lobe; CRB, cerebellum; IC, internal capsule; CR, corona radiata; CC, corpus callosum; TR, thalamic radiation; FOF, fronto-occipital fasciculus; LF, longitudinal fasciculus; Fr, forceps.

**Table S6.** Regression coefficient ( $\beta$ ), including standard error (SE) in italics, and significance ( $p$ -value) of Radial Diffusivity vs. Hypertension, age, smoking, sex, diabetes, and cholesterol across 14 WM ROIs. The multiple regression model is given by:  $RD \sim \beta_0 + \beta_{age} \times age + \beta_{Hypertension} \times Hypertension + \beta_{SBP} \times SBP + \beta_{Smoking} \times Smoking + \beta_{sex} \times sex + \beta_{Diabetes} \times Diabetes + \beta_{Cholesterol} \times Cholesterol$ . The regression model accounted for sex, smoking status, diabetes status and hypertension as categorical variables. Bolded  $p$ -values indicate statistical significance ( $p < 0.05$ ) or close-to-significance ( $p < 0.1$ ).

| ROIs | Radial Diffusivity (RD)                        |                                       |                                       |                                           |                                       |                                            |                                               |  |
|------|------------------------------------------------|---------------------------------------|---------------------------------------|-------------------------------------------|---------------------------------------|--------------------------------------------|-----------------------------------------------|--|
|      | Hypertension<br>$\beta$ (SE) *10 <sup>-5</sup> | Age<br>$\beta$ (SE) *10 <sup>-6</sup> | SBP<br>$\beta$ (SE) *10 <sup>-6</sup> | Smoking<br>$\beta$ (SE) *10 <sup>-5</sup> | Sex<br>$\beta$ (SE) *10 <sup>-5</sup> | Diabetes<br>$\beta$ (SE) *10 <sup>-5</sup> | Cholesterol<br>$\beta$ (SE) *10 <sup>-7</sup> |  |
| WB   | 2.62 (1.60), 0.122                             | 2.87 (0.41), <0.001                   | -0.59 (0.50), 0.261                   | -1.63 (1.33), 0.522                       | 4.42 (1.36), <b>0.023</b>             | -0.57 (3.55), 0.940                        | -1.47 (2.09), 0.842                           |  |
| FL   | 4.29 (1.76), <b>0.026</b>                      | 4.34 (0.45), <0.001                   | -1.41 (0.55), <b>0.059</b>            | 1.99 (1.47), 0.522                        | 3.29 (1.49), 0.145                    | -1.71 (3.91), 0.940                        | -0.42 (2.31), 0.878                           |  |
| OL   | 3.99 (1.13), <b>0.002</b>                      | 2.75 (0.29), <0.001                   | -0.93 (0.35), <b>0.059</b>            | 0.34 (0.94), 0.972                        | 1.77 (0.96), 0.241                    | -0.42 (2.51), 0.940                        | -1.51 (1.48), 0.842                           |  |
| PL   | 1.84 (1.46), 0.229                             | 1.03 (0.37), <b>0.004</b>             | -0.84 (0.46), <b>0.092</b>            | -0.10 (1.22), 0.972                       | -0.77 (1.24), 0.628                   | 3.02 (3.25), 0.875                         | -1.51 (1.92), 0.842                           |  |
| TL   | 10.1 (2.60), <b>0.002</b>                      | 3.75 (0.67), <0.001                   | -1.88 (0.82), <b>0.064</b>            | 2.71 (2.17), 0.522                        | 1.39 (2.21), 0.628                    | 1.55 (5.78), 0.940                         | -2.01 (3.41), 0.842                           |  |
| CRB  | 5.21 (2.17), <b>0.026</b>                      | 2.40 (0.56), <0.001                   | -1.53 (0.68), <b>0.064</b>            | 1.04 (1.81), 0.884                        | 1.74 (1.85), 0.548                    | 0.11 (4.83), 0.981                         | -2.84 (2.85), 0.842                           |  |
| CC   | 6.10 (1.85), <b>0.004</b>                      | 2.42 (0.47), <0.001                   | -1.07 (0.58), <b>0.092</b>            | 1.17 (1.55), 0.790                        | 0.13 (1.58), 0.989                    | 6.45 (4.13), 0.688                         | -1.20 (2.43), 0.842                           |  |
| IC   | 6.02 (1.90), <b>0.005</b>                      | 2.33 (0.49), <0.001                   | -1.13 (0.60), <b>0.092</b>            | -0.22 (1.59), 0.972                       | 2.59 (1.62), 0.264                    | -2.63 (4.24), 0.940                        | -0.38 (2.50), 0.878                           |  |
| CR   | 4.27 (1.21), <b>0.002</b>                      | 1.84 (0.31), <0.001                   | -0.39 (0.38), 0.310                   | 0.09 (1.01), 0.972                        | 0.01 (1.03), 0.830                    | 3.94 (2.69), 0.688                         | -0.71 (1.59), 0.842                           |  |
| CP   | 5.30 (1.78), <b>0.007</b>                      | 2.49 (0.46), <0.001                   | -1.34 (0.56), <b>0.064</b>            | 1.62 (1.48), 0.555                        | 0.94 (1.51), 0.628                    | 6.23 (3.96), 0.688                         | -1.65 (2.33), 0.842                           |  |
| TR   | 3.76 (1.06), <b>0.002</b>                      | 1.41 (0.27), <0.001                   | -0.88 (0.33), <b>0.059</b>            | -0.03 (0.89), 0.972                       | 0.85 (0.91), 0.548                    | 2.12 (2.37), 0.875                         | -0.93 (1.40), 0.842                           |  |
| FOF  | 6.11 (1.94), <b>0.005</b>                      | 2.60 (0.50), <0.001                   | -1.16 (0.61), <b>0.092</b>            | 2.42 (1.62), 0.522                        | 2.85 (1.65), 0.248                    | 1.46 (4.33), 0.940                         | -1.12 (2.55), 0.842                           |  |
| LF   | 3.86 (2.13), <b>0.094</b>                      | 6.35 (0.55), <0.001                   | -1.42 (0.67), <b>0.073</b>            | 2.39 (1.78), 0.522                        | 3.98 (1.81), 0.145                    | -2.90 (4.75), 0.940                        | -2.27 (2.80), 0.842                           |  |
| Fr   | 2.24 (3.02), 0.460                             | 8.21 (0.77), <0.001                   | -1.51 (0.95), 0.136                   | 3.25 (2.52), 0.522                        | 3.32 (2.57), 0.398                    | -8.00 (6.72), 0.832                        | 0.94 (3.96), 0.878                            |  |

RD, radial diffusivity; WM, white matter; ROI, region-of-interest; WB, whole brain; FL, frontal lobe; OL, occipital lobe; PL, parietal lobe; TL, temporal lobe; CRB, cerebellum; IC, internal capsule; CR, corona radiata; CC, corpus callosum; TR, thalamic radiation; FOF, fronto-occipital fasciculus; LF, longitudinal fasciculus; Fr, forceps.

**Table S7.** Regression coefficient ( $\beta$ ), including standard error (SE) in italics, and significance ( $p$ -value) of Axial Diffusivity vs. Hypertension, age, smoking, sex, diabetes, and cholesterol across 14 WM ROIs. The multiple regression model is given by:  $AxD \sim \beta_0 + \beta_{age} \times age + \beta_{Hypertension} \times Hypertension + \beta_{SBP} \times SBP + \beta_{Smoking} \times Smoking + \beta_{sex} \times sex + \beta_{Diabetes} \times Diabetes + \beta_{Cholesterol} \times Cholesterol$ . The regression model accounted for sex, smoking status, diabetes status and hypertension as categorical variables. Bolded  $p$ -values indicate statistical significance ( $p < 0.05$ ) or close-to-significance ( $p < 0.1$ ).

| ROIs | Axial Diffusivity (AxD)                        |                                       |                                       |                                           |                                       |                                            |                                               |
|------|------------------------------------------------|---------------------------------------|---------------------------------------|-------------------------------------------|---------------------------------------|--------------------------------------------|-----------------------------------------------|
|      | Hypertension<br>$\beta$ (SE) *10 <sup>-5</sup> | Age<br>$\beta$ (SE) *10 <sup>-6</sup> | SBP<br>$\beta$ (SE) *10 <sup>-6</sup> | Smoking<br>$\beta$ (SE) *10 <sup>-5</sup> | Sex<br>$\beta$ (SE) *10 <sup>-5</sup> | Diabetes<br>$\beta$ (SE) *10 <sup>-5</sup> | Cholesterol<br>$\beta$ (SE) *10 <sup>-7</sup> |
| WB   | 3.07 (1.70), <b>0.086</b>                      | 3.06 (0.43), < <b>0.001</b>           | -0.58 (0.53), 0.277                   | 1.77 (1.41), 0.609                        | 4.38 (1.44), <b>0.045</b>             | -0.64 (3.78), 0.867                        | -1.46 (2.23), 0.905                           |
| FL   | 5.01 (1.83), <b>0.012</b>                      | 4.54 (0.47), < <b>0.001</b>           | -1.44 (0.58), <b>0.069</b>            | 1.93 (1.53), 0.609                        | 3.38 (1.56), 0.158                    | -1.49 (4.08), 0.867                        | -0.29 (2.40), 0.905                           |
| OL   | 4.47 (1.29), <b>0.003</b>                      | 3.11 (0.33), < <b>0.001</b>           | -1.00 (0.40), <b>0.069</b>            | 0.33 (1.07), 0.883                        | 1.64 (1.09), 0.385                    | -0.53 (2.87), 0.867                        | -1.95 (1.69), 0.905                           |
| PL   | 1.61 (1.59), 0.336                             | 1.21 (0.41), <b>0.004</b>             | -0.92 (0.50), <b>0.098</b>            | -0.30 (1.32), 0.883                       | -1.16 (1.35), 0.634                   | 1.83 (3.54), 0.867                         | -1.67 (2.08), 0.905                           |
| TL   | 12.3 (3.16), <b>0.002</b>                      | 4.43 (0.81), < <b>0.001</b>           | -2.01 (0.99), <b>0.081</b>            | 2.80 (2.63), 0.678                        | 1.54 (2.68), 0.763                    | 3.32 (7.03), 0.867                         | -1.75 (4.14), 0.905                           |
| CRB  | 5.54 (2.36), <b>0.030</b>                      | 2.10 (0.60), < <b>0.001</b>           | -1.71 (0.74), <b>0.069</b>            | 0.78 (1.97), 0.883                        | 1.67 (2.01), 0.634                    | -0.97 (5.25), 0.867                        | -3.46 (3.09), 0.905                           |
| CC   | 6.27 (1.83), <b>0.003</b>                      | 2.62 (0.47), < <b>0.001</b>           | -1.14 (0.57), <b>0.081</b>            | 0.92 (1.53), 0.883                        | -0.24 (1.56), 0.880                   | 6.20 (4.07), 0.867                         | -1.12 (2.40), 0.905                           |
| IC   | 7.07 (2.22), <b>0.004</b>                      | 2.27 (0.57), < <b>0.001</b>           | -1.16 (0.70), 0.124                   | 0.31 (1.85), 0.883                        | 2.57 (1.89), 0.415                    | -4.42 (4.95), 0.867                        | -0.73 (2.92), 0.905                           |
| CR   | 4.90 (1.30), <b>0.002</b>                      | 2.09 (0.33), < <b>0.001</b>           | -0.49 (0.41), 0.256                   | 0.16 (1.09), 0.883                        | -0.39 (1.11), 0.830                   | 3.89 (2.90), 0.867                         | -1.09 (1.71), 0.905                           |
| CP   | 5.36 (1.91), <b>0.011</b>                      | 2.52 (0.49), < <b>0.001</b>           | -1.37 (0.60), <b>0.069</b>            | 1.28 (1.59), 0.847                        | 0.86 (1.62), 0.763                    | 4.52 (4.25), 0.867                         | -2.13 (2.50), 0.905                           |
| TR   | 4.22 (1.22), <b>0.003</b>                      | 1.56 (0.31), < <b>0.001</b>           | -0.98 (0.38), <b>0.069</b>            | -0.19 (1.02), 0.883                       | 0.45 (1.04), 0.776                    | 1.38 (2.71), 0.867                         | -1.75 (1.60), 0.905                           |
| FOF  | 7.40 (2.21), <b>0.003</b>                      | 3.21 (0.57), < <b>0.001</b>           | -1.38 (0.69), <b>0.081</b>            | 2.73 (1.84), 0.609                        | 2.93 (1.88), 0.385                    | 1.72 (4.92), 0.867                         | -0.96 (2.90), 0.905                           |
| LF   | 3.87 (2.14), <b>0.086</b>                      | 6.47 (0.55), < <b>0.001</b>           | -1.47 (0.67), <b>0.074</b>            | 2.36 (1.78), 0.609                        | 3.92 (1.82), 0.158                    | -2.80 (4.76), 0.867                        | -2.13 (2.80), 0.905                           |
| Fr   | 2.23 (3.05), 0.465                             | 8.41 (0.78), < <b>0.001</b>           | -1.56 (0.96), 0.124                   | 3.16 (2.54), 0.609                        | 3.21 (2.59), 0.439                    | -8.03 (6.79), 0.867                        | -0.70 (4.00), 0.905                           |

AxD, axial diffusivity; WM, white matter; ROI, region-of-interest; WB, whole brain; FL, frontal lobe; OL, occipital lobe; PL, parietal lobe; TL, temporal lobe; CRB, cerebellum; IC, internal capsule; CR, corona radiata; CC, corpus callosum; TR, thalamic radiation; FOF, fronto-occipital fasciculus; LF, longitudinal fasciculus; Fr, forceps.
